# Supplementary material for: Stem-Cell-Derived β-Like Cells with a Functional PTPN2 Knockout Display Increased Immunogenicity
Source: MDPI journal article supplement (doi:10.3390/cells11233845), 2022-11-30
Supplement: s1 [file s1]

## Supplementary Data

**Supp. Table S1:** Immunofluorescence and flow cytometry antibody concentrations

| <b>Primary Antibodies</b>        | <b>Dilution</b> | <b>Company</b>          | <b>Catalog Number</b> |
|----------------------------------|-----------------|-------------------------|-----------------------|
| Rat-human CPEP                   | 1000            | Hybridoma/DSHB          | GN-ID4                |
| Rabbit-human PTPN2               | 100             | Millipore-Sigma         | HPA046176-100UL       |
| Mouse-human HLA-ABC              | 200             | Biolegend               | 311420                |
| Mouse-human GCG                  | 1000            | Sigma-Aldrich           | G2654-100UL           |
| Rabbit-human SST                 | 200             | Phoenix Pharmaceuticals | h-060-03              |
| Guinea pig-human INS             | 500             | Dako                    | A0564                 |
| Mouse-human NKX6.1               | 200             | DSHB                    | F55A10                |
| <b>Flow Cytometry Antibodies</b> | <b>Dilution</b> | <b>Company</b>          | <b>Catalog Number</b> |
| Mouse-human FOXA2 PE             | 200             | BD Bioscience           | 561589                |
| Mouse-human SOX17 Alexa<br>488   | 200             | BD Bioscience           | 562205                |
| Mouse-human SOX2 Alexa<br>594    | 100             | Biolegend               | 656106                |
| Mouse-human TRA160 Alexa<br>647  | 100             | Biolegend               | 330606                |
| Mouse-human HLA-ABC              | 200             | Biolegend               | 311420                |

| <b>Secondary Antibodies</b>       | <b>Dilution</b> | <b>Company</b> | <b>Serial Number</b> |
|-----------------------------------|-----------------|----------------|----------------------|
| DAPI                              | 1000            | Invitrogen     | P36935               |
| Anti-rat Alexa 488                | 1000            | Thermo Fisher  | A-21208              |
| Anti-rabbit Alexa 555             | 1000            | Thermo Fisher  | A-31572              |
| Anti-mouse Alexa 647              | 1000            | Thermo Fisher  | A-31571              |
| Anti-mouse Alexa 555              | 1000            | Thermo Fisher  | A-21208              |
| Anti-rabbit Alexa 647             | 1000            | Thermo Fisher  | A-31572              |
| Anti-guinea pig Alexa 488         | 1000            | Thermo Fisher  | A-31571              |
| Zombie Aqua Fixable Viability Kit | 500             | Biolegend      | 423102               |

**Supp. Table S2: Western blot antibody concentrations**

| Antibody            | Dilution | Company         | Catalog Number  |
|---------------------|----------|-----------------|-----------------|
| Rabbit-human PTPN2  | 500      | Millipore-Sigma | HPA046176-100UL |
| Mouse-human HLA-ABC | 100      | Biolegend       | 311420          |
| Anti-rabbit HRP     | 1000     | Thermo Fisher   | 31460           |
| Anti-mouse HRP      | 1000     | Invitrogen      | 31430           |

**Supp. Table S3: Differential gene expression analysis of upregulated and downregulated genes**

| Gene_Symbol | Average_Expression | Log2_Fold_Change  | P_Value              | Adj_P_Value          |
|-------------|--------------------|-------------------|----------------------|----------------------|
| AC008770.4  | 16.9276103292279   | -7.39615163730378 | 5.13323553328244e-09 | 2.32698899879208e-06 |
| HENMT1      | 22.2244329093681   | -7.05803948605407 | 1.82662732286186e-10 | 1.25634167523457e-07 |
| SOX1-OT     | 62.8846553796748   | -6.82070417351137 | 3.52771148549749e-05 | 0.0039173530578236   |
| CHL1        | 37.7354908372708   | -6.51485816659156 | 1.45642926432014e-09 | 7.85133462327827e-07 |
| THEM6       | 88.4388675594001   | -6.33578593610263 | 4.07979246199744e-10 | 2.54298563896878e-07 |
| KCNIP3      | 12.1079971946242   | -6.17833801281077 | 2.28344592140932e-07 | 6.996137814908E-05   |
| IRAK4       | 39.7746628692618   | -6.17656854141351 | 4.23082742525184e-14 | 6.49139106339025e-11 |
| CEBPZOS     | 76.7311249547649   | -6.11266459572748 | 4.44686667026804e-24 | 1.26710289435952e-20 |
| QPCT        | 581.000221682357   | -6.09394264593786 | 2.61422737474596e-56 | 2.60716896083415e-52 |
| PHBP2       | 11.4243343541003   | -6.0833116785505  | 5.43159475382799e-08 | 1.90067699929567e-05 |
| ZNF841      | 78.7644035805555   | -5.56784693682784 | 1.19397101799485e-30 | 5.9537364812313e-27  |
| C9orf64     | 89.6845167261116   | -5.17208005229279 | 1.24028453311432e-24 | 4.12311921624972e-21 |
| PSCA        | 62.015055282846    | -5.11505360784986 | 6.50670182525798e-09 | 2.76133350226799e-06 |
| LINC01833   | 48.7050657590972   | -5.00220954747028 | 2.02988369008208e-05 | 0.00271731946861592  |
| ZNF781      | 38.3603160709087   | -4.7613624798583  | 2.94052332474615e-16 | 5.86516782353868e-13 |
| MTUS2       | 636.020643612133   | -4.3528240845671  | 2.13114028207234e-39 | 1.4169241355405e-35  |
| TBX1        | 58.3779052174914   | -4.176064074434   | 1.89899670610291e-09 | 9.94572321420221e-07 |
| AMN         | 219.378477713819   | -4.09196422318589 | 5.16513737802366e-23 | 1.28779787677575e-19 |
| FABP7       | 43.2321669325889   | -4.03618423823636 | 5.01837872133387e-06 | 0.000935701496421793 |
| TMEM45B     | 84.2119146766332   | -3.87689327129751 | 1.1737221451273e-19  | 2.60122910074545e-16 |
| CCDC152     | 28.7791743485142   | -3.62262150973661 | 1.60041323637884e-13 | 2.12812282752083e-10 |
| JAM2        | 78.6138613064803   | -3.50639765111902 | 7.52140341158695e-05 | 0.00675774380394204  |
| NPY         | 22.3037192203324   | -3.4252806253089  | 5.01955580653424e-06 | 0.000935701496421793 |
| GDF7        | 22.4374308454953   | -3.38032292966499 | 1.33387467089113e-05 | 0.00197077512485885  |
| GLUD2       | 165.294007849288   | -3.15824795697689 | 5.39209163996166e-09 | 2.39001466334834e-06 |
| ZNF501      | 17.0963884551785   | -3.12717019066074 | 1.51772529765242e-05 | 0.00216909656488732  |

|                |                  |                   |                      |                      |
|----------------|------------------|-------------------|----------------------|----------------------|
| ZNF844         | 69.4419823533117 | -3.06846553023025 | 2.44204733838139e-12 | 2.56363559007133e-09 |
| COL13A1        | 48.6209218371613 | -2.94329162577649 | 1.38788471967617e-05 | 0.00203549622196036  |
| STK32B         | 70.6780279394179 | -2.91684267863254 | 2.10042648731796e-05 | 0.00279300711440294  |
| CNTN2          | 86.1500871466087 | -2.84425131630264 | 3.91467720944607e-06 | 0.000765511290388346 |
| ZNF875         | 426.546828321387 | -2.83992930155236 | 6.6333763690062e-62  | 1.32309325056198e-57 |
| DAW1           | 20.5320850379952 | -2.83363269070895 | 9.46866189558136e-05 | 0.00807102265680623  |
| KLK13          | 130.288525812354 | -2.80807845016074 | 0.000133712813518276 | 0.0102578299170598   |
| ADGRB1         | 82.7241568817753 | -2.76787088675132 | 6.58357800204366e-05 | 0.00617376687865502  |
| PUS7L          | 153.19874669085  | -2.7533375010483  | 1.38511045267416e-12 | 1.53485628272438e-09 |
| LINC01535      | 13.3847195540517 | -2.73658900678414 | 2.26932890443288e-05 | 0.002864812299229    |
| TRIM58         | 30.7682757754058 | -2.71331709117127 | 0.00016417981376709  | 0.0117373855390623   |
| TF             | 461.221070033873 | -2.64430477693544 | 1.49399119506309e-10 | 1.10367216210105e-07 |
| ZNF283         | 49.6713828531055 | -2.6281048255158  | 3.80881368453397e-12 | 3.6176475119864e-09  |
| SOX2           | 571.923332121034 | -2.61756685805309 | 3.45579690575688e-06 | 0.000718013802939861 |
| KLK10          | 126.584306411394 | -2.61629991468919 | 7.19288146047081e-07 | 0.000196533169329522 |
| TRABD2B        | 224.980499285663 | -2.57900512903945 | 5.24942319060342e-05 | 0.00536948692101414  |
| H2BC14         | 45.1993153315963 | -2.52206269418926 | 6.82867700437892e-07 | 0.000191837734548369 |
| SLIT1          | 1950.54526575647 | -2.49766875388471 | 0.000154868622749717 | 0.0113985592227522   |
| CYP26B1        | 89.2254716779295 | -2.49341587022212 | 0.000214966201529005 | 0.0142449031750749   |
| MIR124-1HG     | 94.7558873869623 | -2.47192565067249 | 2.23050186954164e-06 | 0.00049180221606157  |
| AL137786.1     | 12.2593830962957 | -2.41176617632217 | 2.34497676078855e-05 | 0.00294169223086091  |
| CLCN3P1        | 30.1493336390662 | -2.38617426021343 | 1.71802361440643e-06 | 0.000398461616429658 |
| BMPR1B         | 63.4261528621762 | -2.34733396335961 | 2.3929385215376e-05  | 0.0029645684317136   |
| GRIA1          | 153.440788693016 | -2.30587223873594 | 1.10885788971595e-05 | 0.00174151806836805  |
| LINC00665      | 190.691029814776 | -2.30054755859959 | 1.30688940701946e-14 | 2.17226800936751e-11 |
| VWA3A          | 96.4253677697378 | -2.21855345367053 | 1.6011131516688e-10  | 1.14056439011378e-07 |
| GALR1          | 63.9096649099122 | -2.17565896591353 | 0.000196458560641732 | 0.013419734419726    |
| TCEAL5         | 287.188954752021 | -2.14116443032159 | 3.47636926252874e-11 | 2.88915255459993e-08 |
| LINC01882      | 15.6418226754415 | -2.13668998729675 | 0.000191820303346306 | 0.0131479304829739   |
| FAM66B         | 70.5809994082742 | -2.12621438515264 | 2.29194676942571e-09 | 1.11500415275525e-06 |
| FABP3          | 247.000143616805 | -2.0874051423977  | 5.54793259210174e-05 | 0.00555611031389358  |
| ST8SIA1        | 87.207918818387  | -2.07943556716369 | 4.28774137224221e-05 | 0.00462288050868881  |
| AC007608.3     | 20.9052968988956 | -2.05894256120298 | 1.61041371595812e-05 | 0.00226206422383807  |
| PNCK           | 16.935839745172  | -2.05654237894118 | 0.000147786565174561 | 0.0111657228370144   |
| VASH2          | 51.9077413430709 | -2.04896152254863 | 0.00013368089364277  | 0.0102578299170598   |
| PRDM8          | 28.4296028476535 | -2.03280615040869 | 0.000166953814694995 | 0.0118649665394584   |
| RGS5           | 287.822997382032 | -2.02419574702978 | 2.36995881069213e-09 | 1.12550472471584e-06 |
| CLDN19         | 67.1188435830853 | -1.9461166670589  | 0.000119486519792281 | 0.00959150550399578  |
| ELAVL3         | 187.532017158908 | -1.92830416591448 | 0.000110543824908123 | 0.00903650463777628  |
| RGS22          | 29.374154953076  | -1.91061145595221 | 3.19531376559337e-05 | 0.00362123456639349  |
| ARHGAP19-SLIT1 | 72.9616357587185 | -1.90041831758642 | 0.000126944822494053 | 0.00985230128197038  |
| GRIK4          | 126.659870439044 | -1.85905176823613 | 3.01092532146466e-05 | 0.00347144025791527  |
| PTGIS          | 94.9829607943162 | -1.85698029762023 | 1.99193702249305e-09 | 9.94572321420221e-07 |
| SYNDIG1        | 63.4566782425514 | -1.84169563820344 | 2.46995843772767e-07 | 7.35310313416658e-05 |
| SDK2           | 1421.98065996761 | -1.78959782951525 | 3.12584288901761e-11 | 2.7107853158411e-08  |
| EPHB1          | 269.765921624948 | -1.78128638421785 | 4.95039452891635e-06 | 0.000935701496421793 |
| CDHR3          | 641.412784962643 | -1.76525518080253 | 1.30170162253816e-05 | 0.00195451768399138  |
| LRP8           | 472.415408187504 | -1.69875760274219 | 7.59297616010876e-10 | 4.20693062470915e-07 |
| CAVIN4         | 49.5026436411105 | -1.69162116740513 | 5.77192814490774e-06 | 0.0010562098970489   |
| SNORD17        | 2593.46180733423 | -1.67745538114853 | 8.52134155893746e-06 | 0.00141638898945472  |

|           |                  |                   |                      |                      |
|-----------|------------------|-------------------|----------------------|----------------------|
| ADAM23    | 142.682662105269 | -1.66664585392292 | 3.52470584435706e-06 | 0.000722490392190181 |
| APBA2     | 365.663991948344 | -1.61253562861292 | 2.20215485758097e-06 | 0.00049180221606157  |
| CFAP74    | 94.3688459628154 | -1.60306640629755 | 0.000173153053900516 | 0.0121581360523346   |
| ENO4      | 55.0787331657322 | -1.59242608174577 | 0.000221939684838737 | 0.0145119552285874   |
| EFR3B     | 279.549450164911 | -1.5838699407528  | 8.40595255224786e-05 | 0.00735373375469894  |
| EFCAB12   | 108.297069902356 | -1.56617776305814 | 3.71945082293423e-05 | 0.0040987937079694   |
| TSPAN18   | 467.69395989169  | -1.55143466640765 | 1.34617932693837e-12 | 1.53485628272438e-09 |
| NRIP3     | 68.8488449812889 | -1.54451659099122 | 2.48235587302584e-05 | 0.00301908964898619  |
| PLTP      | 603.941737527216 | -1.53003826765601 | 1.86814384207155e-08 | 7.16576866806907e-06 |
| INSYN2A   | 73.0928609446169 | -1.5238510761745  | 0.000108237540474816 | 0.00893601055463958  |
| SLC35F1   | 76.1206838427196 | -1.50592556827591 | 0.000167154095938424 | 0.0118649665394584   |
| PNPLA3    | 188.639996927308 | -1.49958783483527 | 2.40098668016755e-13 | 2.99313002016387e-10 |
| CDH26     | 115.350570745589 | -1.49392742129265 | 4.07948747792311e-06 | 0.000789994730433537 |
| TAF45     | 229.094718550793 | -1.46842836817791 | 6.29942526728723e-07 | 0.000182099038233784 |
| PCSK9     | 252.629818439525 | -1.46353153152925 | 0.00015351688955631  | 0.0113985592227522   |
| PCDHGB7   | 163.472778642781 | -1.46184914248256 | 2.71162252253576e-05 | 0.00318153075497049  |
| ATP8A2    | 127.769132657606 | -1.43948790304217 | 0.000122828172801065 | 0.00976068021788865  |
| GRIK3     | 1727.50652298755 | -1.39657416566537 | 0.000200755128026782 | 0.0136199380395313   |
| CDH7      | 65.5925124931835 | -1.38682777843488 | 3.91779387936083e-05 | 0.00429364377569952  |
| GPR162    | 92.0389754486906 | -1.35544940171381 | 5.97045974443618e-06 | 0.00106409105299985  |
| SLC13A3   | 47.8053778697953 | -1.35401978045706 | 2.97949727693013e-05 | 0.00347144025791527  |
| CFAP92    | 226.452725601287 | -1.32565999544946 | 1.30323168561797e-06 | 0.000322408125777479 |
| AFF3      | 325.909893342799 | -1.31435817482215 | 8.06261313292951e-05 | 0.00717932506917018  |
| HOMER3    | 126.022044252044 | -1.30317769206358 | 0.00015269463541478  | 0.0113985592227522   |
| PDE11A    | 76.7637593054119 | -1.26126624883777 | 1.72973878647568e-05 | 0.00239592846076694  |
| TMEM178A  | 74.5804452578439 | -1.25503629210251 | 8.20921245870666e-05 | 0.00727737563117169  |
| CIT       | 769.292513583339 | -1.24672905774164 | 0.000105742002787095 | 0.00879360998598132  |
| SPAG8     | 48.7123053249938 | -1.24139344449071 | 5.94830742803282e-05 | 0.0057316396115721   |
| AK5       | 361.137328323812 | -1.22066379283883 | 7.18395714179536e-05 | 0.00661977555674585  |
| CRB2      | 977.761462919898 | -1.20973196224931 | 0.000161033546371651 | 0.0116375909997426   |
| LINC01197 | 81.5347911459607 | -1.19684593922274 | 5.58777754504273e-05 | 0.00555611031389358  |
| LRRIQ1    | 125.655441453368 | -1.17273492982266 | 2.24375823030196e-06 | 0.00049180221606157  |
| GALNT16   | 300.865780654425 | -1.16135926421916 | 6.66393619432426e-07 | 0.000189884101902845 |
| TMEFF1    | 294.89596578478  | -1.15476803226501 | 7.43885509862046e-10 | 4.20693062470915e-07 |
| POU2F2    | 66.580024788132  | -1.13094933418088 | 0.000169958455616878 | 0.0119787680414638   |
| GLB1L2    | 240.106799463853 | -1.09132361427727 | 7.45552993379869e-05 | 0.00672886878097505  |
| ZFP82     | 120.770546234535 | -1.06629333268348 | 6.80541531956475e-06 | 0.00117017943072447  |
| STARD9    | 610.759849242279 | -1.04514628237199 | 4.09671421114397e-08 | 1.48569203009959e-05 |
| FAT3      | 3819.72464744818 | -1.03765616904463 | 1.15639644519088e-15 | 2.09686213597976e-12 |
| KLHL14    | 57.8631778470166 | -1.03015940168751 | 2.44573066384386e-05 | 0.00299279409944968  |
| TIMELESS  | 1058.80714228094 | -1.02961955429386 | 7.20613246121756e-08 | 2.39555863452409e-05 |
| FAM27C    | 144.497796722378 | -1.01830841573925 | 0.000160195446475485 | 0.011619121365091    |
| PER3      | 312.138818111883 | -1.00026857968478 | 1.32967411905676e-06 | 0.000323435121691539 |
| ARHGEF4   | 393.903616096281 | -0.98657544115277 | 9.42751048246956e-06 | 0.00154132068920769  |
| CAD       | 1925.62838252244 | -0.42510279831855 | 9.61772563802583e-06 | 0.00154705770625857  |
| CD63      | 4231.97757539401 | 0.43026675329535  | 6.16784247884919e-06 | 0.00108870607153209  |
| DOK4      | 1382.93051899788 | 0.58644953358132  | 0.00015425526529879  | 0.0113985592227522   |
| MAP3K13   | 467.404688463618 | 0.62595807656109  | 5.90013125161823e-05 | 0.00571281640508627  |
| TMEM59    | 4231.27125936604 | 0.64128846244713  | 1.57114863972981e-05 | 0.00222256246581921  |
| MYO3A     | 2514.93741799287 | 0.71208607816489  | 6.30105424445592e-06 | 0.00109917649954437  |

|            |                  |                  |                      |                      |
|------------|------------------|------------------|----------------------|----------------------|
| CLU        | 22723.4887331088 | 0.91428696107348 | 4.31956280604344e-05 | 0.00463215052308293  |
| CCDC68     | 210.911022894206 | 0.99157808388485 | 7.2019016134255e-05  | 0.00661977555674585  |
| KRT8P46    | 135.000746511139 | 1.02163650895731 | 0.000207393559537607 | 0.0138432812990456   |
| CTSZ       | 9169.90692838244 | 1.07617418292432 | 7.62419529455054e-07 | 0.00020276293246014  |
| SMIM6      | 370.074559747987 | 1.10029612900564 | 1.73397533140045e-07 | 5.48982094604975e-05 |
| DMTN       | 1291.52579946529 | 1.10256211272733 | 7.39294232624936e-05 | 0.00670271034724408  |
| TMEM238    | 414.868084386097 | 1.1210895561402  | 0.000108418457546515 | 0.00893601055463958  |
| AC012101.2 | 311.850458045992 | 1.14643663230266 | 2.42774865750229e-05 | 0.00298912806929264  |
| ALDH1A1    | 11238.7957971455 | 1.17028605182656 | 1.42800092648011e-05 | 0.00207904426858192  |
| CDH10      | 591.751308877031 | 1.17979430246455 | 3.12351066480867e-07 | 9.16199172356966e-05 |
| LINC01036  | 67.549546747744  | 1.23340190567192 | 0.000112587546630062 | 0.00916600491870697  |
| SKOR2      | 185.695663007126 | 1.24817383027903 | 2.83493491095929e-09 | 1.31501422637195e-06 |
| EGFL7      | 1614.28459159702 | 1.25242377454946 | 1.22409524469887e-24 | 4.12311921624972e-21 |
| FA2H       | 207.004769215174 | 1.25725891067001 | 6.33737578700502e-06 | 0.00109917649954437  |
| GDA        | 422.787589799994 | 1.25957341641157 | 0.000105809004142962 | 0.00879360998598132  |
| BIK        | 189.755426037418 | 1.26933683752494 | 1.65842294878039e-06 | 0.000389163578074985 |
| VWA5A      | 2027.08277524063 | 1.27767806396723 | 6.28669096531716e-11 | 5.01577351976865e-08 |
| EGFR       | 2616.65661040266 | 1.2863138664191  | 1.99452987349889e-09 | 9.94572321420221e-07 |
| TTC22      | 341.340189287422 | 1.31526950828773 | 0.000119791761620071 | 0.00959150550399578  |
| ZNF69      | 103.8825355431   | 1.33155264424366 | 6.66417963058594e-08 | 2.25294452392656e-05 |
| C2CD4B     | 970.237680735714 | 1.33543439622759 | 1.41113193779913e-13 | 2.0104598308101e-10  |
| TMEM236    | 1700.24767375668 | 1.33596018436942 | 0.000109033482945467 | 0.00894971955074193  |
| TMEM61     | 201.47753364237  | 1.34361843409112 | 3.53516269130777e-05 | 0.0039173530578236   |
| BDKRB2     | 668.954618464325 | 1.37551213782597 | 1.10278489336655e-05 | 0.00174151806836805  |
| NCKAP5     | 2158.2329993646  | 1.42923974776548 | 2.99416901164916e-05 | 0.00347144025791527  |
| HS3ST3B1   | 398.090706263412 | 1.44849034193904 | 0.000126798792863621 | 0.00985230128197038  |
| C2CD4A     | 1453.06590003316 | 1.50895898957441 | 3.95810562067319e-10 | 2.54298563896878e-07 |
| PCDH10     | 917.871615080274 | 1.53263080206173 | 5.09107465749352e-05 | 0.00526148057608113  |
| CNTN1      | 1848.24633318589 | 1.54626584773342 | 1.79091042736612e-07 | 5.58148427878823e-05 |
| IL1R1      | 1174.74606267636 | 1.54938894922828 | 5.63877585752549e-06 | 0.00104139836346485  |
| GRPR       | 357.942743727892 | 1.59845827988076 | 2.38442630593704e-05 | 0.0029645684317136   |
| LINC00643  | 830.468368781083 | 1.60212909847579 | 3.96608047276246e-05 | 0.00432281098960218  |
| ANKRD53    | 152.298616418279 | 1.61234929493344 | 5.60105553852915e-05 | 0.00555611031389358  |
| PON3       | 34.5747344986133 | 1.66666800772157 | 9.39936329851868e-06 | 0.00154132068920769  |
| BTBD17     | 907.005554160403 | 1.72398600739252 | 2.67126183887601e-08 | 9.86684974781869e-06 |
| ZP1        | 30.5557124338402 | 1.75780280091701 | 3.09687607743044e-05 | 0.00352973087088157  |
| CALB1      | 97.3047216267614 | 1.77243461465301 | 2.01168338108377e-06 | 0.000455966326353373 |
| SLC38A4    | 1452.97722572857 | 1.79394801532308 | 4.41777508921889e-10 | 2.67021036150182e-07 |
| AC093898.1 | 107.108144153928 | 1.80464496843297 | 3.99689567630366e-12 | 3.62373096179786e-09 |
| SYT16      | 351.410901121448 | 1.81185807427479 | 0.000136850418643547 | 0.0104583082385601   |
| SCIN       | 199.634430306675 | 1.81253038677059 | 3.93478927626333e-10 | 2.54298563896878e-07 |
| CYP1A1     | 4328.65786077582 | 1.86859998690415 | 1.32188916938754e-08 | 5.49300028595914e-06 |
| AC012645.1 | 26.4691397446541 | 1.93016904429797 | 1.19333393890861e-05 | 0.00184339835200186  |
| GAS2L3     | 1263.98485482806 | 1.95015348034589 | 1.43978623862278e-07 | 4.63193166380161e-05 |
| MLN        | 111.727169898469 | 1.97705570330448 | 9.3565181559145e-05  | 0.00800966142222621  |
| FGF18      | 90.6144331921781 | 2.02565335536336 | 4.39868944318282e-08 | 1.56671892203079e-05 |
| PTGER3     | 1479.97381343113 | 2.16476573073557 | 0.000220232079436714 | 0.0144498324225155   |
| CALHM2     | 27.9883106659349 | 2.29953126267851 | 1.52247828679547e-05 | 0.00216909656488732  |
| AL355102.4 | 62.2049638694738 | 2.63458146057286 | 9.5494402698009e-06  | 0.00154705770625857  |
| LINC01451  | 20.6396015723203 | 2.73001046394698 | 1.32003453341695e-05 | 0.00196488125399511  |
| SPX        | 96.9916767659345 | 3.59380045569277 | 7.24322603545142e-05 | 0.00662721956436303  |

|            |                  |                    |                      |                      |
|------------|------------------|--------------------|----------------------|----------------------|
| CEP250     | 2089.34623470659 | -0.497747643905468 | 5.80056337099108e-05 | 0.00566611436424441  |
| CECR2      | 933.617377286061 | -0.515135543768792 | 0.000208650982267278 | 0.0138725083076771   |
| WDR19      | 665.11030940063  | -0.517897518834272 | 3.57369354556838e-06 | 0.000722490392190181 |
| LIMD2      | 430.085214007991 | -0.537450503220005 | 2.80614766674487e-06 | 0.000608385014792316 |
| NFATC4     | 396.602308645138 | -0.540938559210074 | 0.000187926325363419 | 0.0129254430541336   |
| FYN        | 1319.2931636759  | -0.549054960190743 | 0.000118028094320999 | 0.00953112700132242  |
| EPB41      | 1740.43228119262 | -0.562649734523383 | 1.86333247872431e-05 | 0.00254561846716679  |
| CEP41      | 315.128166645493 | -0.574323503383571 | 0.000103986034105238 | 0.00875149973106783  |
| ZNF75A     | 232.736043849054 | -0.598533807784775 | 1.90281523832858e-05 | 0.00258187433630625  |
| MICAL1     | 1842.26844033216 | -0.605415635964751 | 1.93743673140979e-05 | 0.00261108871923647  |
| CAMSAP2    | 823.824054665051 | -0.620308385762817 | 1.81295631845399e-06 | 0.000415646284228544 |
| PLCG1      | 2149.50854664974 | -0.623864112093955 | 3.24034164113417e-12 | 3.23159271870311e-09 |
| FADS1      | 3636.18795746839 | -0.638626792089584 | 2.92561820621313e-06 | 0.000620791284480075 |
| MSI1       | 1197.22850852444 | -0.666172178400032 | 6.96981176325777e-06 | 0.00118820397803367  |
| THBS3      | 388.619502710537 | -0.674590633050501 | 2.16652757104644e-05 | 0.00284299729816396  |
| PHF21B     | 418.214328227067 | -0.723527424525908 | 0.000176511490146803 | 0.0123101335051333   |
| ZMYM3      | 982.304320153659 | -0.727283442354117 | 5.57944450273049e-05 | 0.00555611031389358  |
| ENAH       | 1686.65818901823 | -0.742829411687303 | 0.000144074652376884 | 0.0109266654612522   |
| C20orf96   | 362.415969944647 | -0.755288580528666 | 1.37320960694328e-06 | 0.000330000467711936 |
| ZNF615     | 133.326188524529 | -0.763419994342447 | 4.68523352494563e-05 | 0.00489739592725707  |
| PPP2R3B    | 710.723392037883 | -0.765624147096903 | 0.000163964337555469 | 0.0117373855390623   |
| CROCC      | 1175.23179251627 | -0.774529014740255 | 1.2106947965118e-05  | 0.00184339835200186  |
| DDAH2      | 456.288639990493 | -0.802038471063271 | 5.16626907826511e-05 | 0.00531167025954     |
| RPGRIP1L   | 291.143399572386 | -0.831876556260702 | 1.30327309721675e-05 | 0.00195451768399138  |
| PTPN2      | 486.539380816153 | -0.838380429588731 | 7.92543888510279e-11 | 6.08003092316386e-08 |
| ZNF107     | 179.018733412328 | -0.855155615979657 | 2.22849058711307e-05 | 0.002864812299229    |
| CFAP43     | 137.077836028583 | -0.868371783018719 | 6.5513827488739e-05  | 0.00617376687865502  |
| MPP3       | 110.653621259928 | -0.871717188908051 | 6.60443327781958e-05 | 0.00617376687865502  |
| AL513548.4 | 59.9700053714785 | -0.929158754503423 | 0.000150926472085583 | 0.0113599223102606   |
| KCTD15     | 308.510444081757 | -0.936189298634179 | 0.000229771134413292 | 0.0148799189837906   |
| AC107871.1 | 93.7469028609015 | -0.944790575143065 | 8.4728007103711e-05  | 0.00735555115427981  |
| GPR173     | 206.488605668234 | -0.960320409447778 | 0.000115558159895364 | 0.00936960592387373  |
| ERC2       | 166.937011408034 | -0.979008583271439 | 9.99031836464025e-07 | 0.000252236569748246 |
| ASAP3      | 503.617796472737 | -0.987623803023967 | 0.000168973913120302 | 0.0119516087627573   |
| ZNF527     | 96.1081924184032 | -0.997881993381917 | 4.4007903065632e-05  | 0.00465649558306719  |
| EIF5       | 5121.14945437085 | 0.340821580233486  | 0.000216714795876081 | 0.0142834097047447   |
| UBE2W      | 577.830833252533 | 0.407082902884412  | 0.000197318809853635 | 0.0134324948168622   |
| LGMN       | 1360.80470913065 | 0.415183808753404  | 5.47225104001789e-05 | 0.00554058473320796  |
| RAB11A     | 3317.15889194922 | 0.416782514244983  | 1.20967958555327e-05 | 0.00184339835200186  |
| NFE2L2     | 1314.86625484967 | 0.429851706486932  | 7.38391587523885e-05 | 0.00670271034724408  |
| SCP2       | 1413.78960158704 | 0.436274816333457  | 0.000125791824264924 | 0.00983954990539441  |
| ITM2B      | 4912.2521791814  | 0.443336500722429  | 0.000125793904836838 | 0.00983954990539441  |
| DAP        | 2901.69312947811 | 0.448055452444758  | 2.56253230093614e-05 | 0.00305926700012906  |
| BCAP31     | 1726.59208759253 | 0.451589948061293  | 5.62686394969669e-05 | 0.00555611031389358  |
| SRPRB      | 1210.06696357008 | 0.452604654718301  | 0.000205510956237189 | 0.0138017560037272   |
| TMEM167A   | 2697.26497381832 | 0.453701263602191  | 0.000207517352271866 | 0.0138432812990456   |
| CAPN2      | 6486.86670444671 | 0.460827191376836  | 2.23577101820787e-05 | 0.002864812299229    |
| RNASEK     | 2965.40345944679 | 0.474265233426514  | 1.39874224019423e-06 | 0.000332134675272788 |
| GSDMD      | 760.963599925207 | 0.478131513310616  | 0.000178346379890658 | 0.0123947626944218   |
| SEC24D     | 3450.98473074605 | 0.493564350006012  | 1.32000449651681e-07 | 4.31619830943023e-05 |
| YPEL5      | 1422.58364175868 | 0.496160432398143  | 0.000128282817784278 | 0.00991755458730698  |



|           |                  |                   |                      |                      |
|-----------|------------------|-------------------|----------------------|----------------------|
| VASP      | 1190.82694127572 | 0.497399420914438 | 0.000123551205191485 | 0.00977917594741808  |
| TMTC1     | 2799.23667280133 | 0.497713012655192 | 2.57674148211011e-05 | 0.00305926700012906  |
| KRT10     | 374.100831273322 | 0.499314612281675 | 5.82349064810039e-05 | 0.00566611436424441  |
| NCOA6     | 3137.45178583311 | 0.500809020288594 | 0.000203309451153162 | 0.0137464756362744   |
| RAB11FIP5 | 766.328890994169 | 0.509833166802542 | 3.03591650696525e-05 | 0.00348013739355913  |
| TUSC3     | 3342.44596110161 | 0.516533367724699 | 4.75256313069461e-06 | 0.000911486771200334 |
| TMED3     | 3016.59668421727 | 0.516753313273698 | 0.000224713143827288 | 0.0145997666670328   |
| PERP      | 2232.62514795736 | 0.521923951903104 | 1.30928798696359e-06 | 0.000322408125777479 |
| DNAJC3    | 2144.84967934221 | 0.526355295565942 | 0.000180744240935133 | 0.0125177938530978   |
| SOWAHB    | 318.476260566584 | 0.527031680739193 | 0.000120218408502905 | 0.00959150550399578  |
| SAMD4A    | 1421.0761724219  | 0.528600884467419 | 0.00018544959069198  | 0.0127992302281738   |
| GPX7      | 663.367767608937 | 0.534722741514324 | 3.50492834001341e-05 | 0.0039173530578236   |
| SETD7     | 1253.70183086625 | 0.535616056374854 | 6.62381486028363e-05 | 0.00617376687865502  |
| UQCR11    | 880.83452400842  | 0.540756178835581 | 8.95137323574321e-05 | 0.00772918140952961  |
| ASAP1     | 4038.782662012   | 0.543608969064408 | 0.000156968599460747 | 0.0114726140503245   |
| PDE3B     | 3530.13331411808 | 0.543698626577196 | 0.000104886514321084 | 0.00879019501953088  |
| CASP3     | 772.867473772907 | 0.548360592002552 | 5.97504251158043e-06 | 0.00106409105299985  |
| C11orf24  | 986.985080963047 | 0.549906438448025 | 0.000152707050330297 | 0.0113985592227522   |
| ITCH      | 1857.84666257036 | 0.551236624747489 | 1.79392564515844e-08 | 7.01600802320203e-06 |
| SSR4      | 3504.13897109569 | 0.559321514039543 | 2.24720456241084e-05 | 0.002864812299229    |
| GPD2      | 1068.02519150389 | 0.577392431875913 | 3.86865208790247e-06 | 0.000764001332131709 |
| GAB2      | 1380.10722681697 | 0.588462719499591 | 1.50498658509296e-05 | 0.00216909656488732  |
| CYBA      | 1137.40192196993 | 0.594030346303346 | 0.00017372248946733  | 0.0121581360523346   |
| TP53INP2  | 2602.67007245458 | 0.598274433968179 | 7.13166988778574e-05 | 0.00661619942240811  |
| ATP6V0B   | 1301.45793354913 | 0.598481425131574 | 0.000222634026869936 | 0.0145119552285874   |
| PRKD3     | 1059.3561406435  | 0.604973035078408 | 2.11970263039959e-05 | 0.00279997275933445  |
| DHRS7     | 1798.82794412276 | 0.608613560260215 | 0.000139922581408027 | 0.0106522740792538   |
| P4HA2     | 1785.85160577395 | 0.610706129055727 | 3.40067815042142e-06 | 0.00071399922514006  |
| CIB1      | 356.388507468355 | 0.625029237105077 | 8.4580288252312e-06  | 0.00141638898945472  |
| FKBP2     | 1104.42852225164 | 0.635699041979698 | 5.92870484638003e-08 | 2.03886115286028e-05 |
| ELL2      | 5693.46113107409 | 0.657798582412891 | 2.03184453677009e-08 | 7.6466360623427e-06  |
| MTFR1     | 586.569707157251 | 0.660996623298216 | 3.58801801940312e-06 | 0.000722490392190181 |
| MON1B     | 1904.85908296856 | 0.663856753281837 | 9.93595174291949e-05 | 0.00839756328238441  |
| MGST2     | 372.013146855127 | 0.671791835544223 | 4.07489103276523e-05 | 0.00441727046410517  |
| SMARCA2   | 13572.7885605972 | 0.674616788252847 | 7.30169311974379e-07 | 0.000196810231035689 |
| TLCD2     | 348.654707052347 | 0.687108946305447 | 8.48178464596589e-05 | 0.00735555115427981  |
| CBR1      | 713.464809504068 | 0.687380200802609 | 5.03736917002928e-05 | 0.00523309195132312  |
| TTC39A    | 1869.74605804322 | 0.688825008826288 | 0.000163942214376666 | 0.0117373855390623   |
| IL10RB    | 223.659453278399 | 0.691255266827149 | 8.36959352991524e-05 | 0.00735373375469894  |
| SASH1     | 1537.10553905624 | 0.691530121699669 | 5.30696031111822e-05 | 0.00540064440640632  |
| GRPEL2    | 338.198965243065 | 0.693750994079816 | 3.4976504533197e-05  | 0.0039173530578236   |
| TIPARP    | 1320.13442714781 | 0.715550346051426 | 3.62223198731666e-06 | 0.000722490392190181 |
| MYLIP     | 396.085756172869 | 0.724911768133687 | 0.000154738287525345 | 0.0113985592227522   |
| MPP2      | 872.223785803888 | 0.732158444627524 | 1.69707892721329e-05 | 0.0023671284113424   |
| AGPAT2    | 879.116067752332 | 0.735624960617983 | 2.66569197907271e-05 | 0.00314614746831859  |
| CST3      | 5338.87217296872 | 0.735929330364531 | 0.000205273279385237 | 0.0138017560037272   |
| C4orf48   | 362.878075534512 | 0.737910496529894 | 9.27182476880858e-05 | 0.00797137141545931  |
| CDS1      | 532.627563431706 | 0.745749825590034 | 2.19554866797444e-05 | 0.00286224926349138  |
| HM13      | 3595.20834073965 | 0.762890840514099 | 7.18694852032962e-07 | 0.000196533169329522 |
| VAMP8     | 471.809438973302 | 0.767480416255672 | 0.000158158691293131 | 0.0115132600603386   |
| MAPK13    | 2725.36846933216 | 0.777249727433374 | 8.86180157740653e-07 | 0.000229555187354481 |



|                   |                  |                   |                      |                      |
|-------------------|------------------|-------------------|----------------------|----------------------|
| <b>IL17RA</b>     | 739.562292653066 | 0.783692011312545 | 1.05997642540608e-05 | 0.00169138318249198  |
| <b>PAK6</b>       | 273.584253525148 | 0.787461657207155 | 4.41230154015692e-05 | 0.00465649558306719  |
| <b>DOK6</b>       | 1808.96171362588 | 0.799951619618196 | 4.35154948440555e-05 | 0.00464149764791193  |
| <b>ANKS4B</b>     | 2262.13856378564 | 0.806303665257318 | 7.88209333057703e-07 | 0.000206863465225907 |
| <b>FOXO1</b>      | 1711.75507390885 | 0.807181713823938 | 8.33753739989529e-05 | 0.00735373375469894  |
| <b>GAREM1</b>     | 2067.1374451853  | 0.816638474455278 | 6.17611799158602e-05 | 0.00592254083943148  |
| <b>CACNA2D1</b>   | 5675.49671534187 | 0.842958198205838 | 1.86102542304589e-05 | 0.00254561846716679  |
| <b>FFAR1</b>      | 792.698209576178 | 0.845956605360298 | 5.66338444183846e-05 | 0.00556462394467537  |
| <b>AL035071.1</b> | 206.890398225742 | 0.848268188484389 | 6.30859437702672e-05 | 0.00602063270067823  |
| <b>ATP1B1</b>     | 3342.87248487682 | 0.860040649072349 | 5.2520709993019e-10  | 3.08111200447282e-07 |
| <b>PLIN2</b>      | 2804.53287652331 | 0.869257605501486 | 9.52964958137663e-05 | 0.00808844215106972  |
| <b>SMG8</b>       | 360.490084359587 | 0.870295027544105 | 2.31497591388714e-07 | 6.996137814908E-05   |
| <b>F3</b>         | 917.506165898506 | 0.872131210201091 | 8.03444739422415e-06 | 0.00135809396377284  |
| <b>CNNM1</b>      | 442.135286666705 | 0.889062281626063 | 6.34255438887451e-05 | 0.00602421856383291  |
| <b>SLC43A2</b>    | 3691.04060724946 | 0.913246196127101 | 4.68967523366139e-05 | 0.00489739592725707  |
| <b>SLC7A14</b>    | 1939.15521623731 | 0.925889973342565 | 5.96991506097722e-06 | 0.00106409105299985  |
| <b>TRIB1</b>      | 818.235787562682 | 0.928422185095651 | 2.55664905275011e-05 | 0.00305926700012906  |
| <b>ZFP92</b>      | 90.6592276274678 | 0.934596065459751 | 7.57326323029628e-05 | 0.00677382548840761  |
| <b>SH3BP5</b>     | 1396.35644241654 | 0.939991803887889 | 2.25531255070538e-05 | 0.002864812299229    |
| <b>PDE5A</b>      | 865.289277700832 | 0.944693862358633 | 0.000157025149691095 | 0.0114726140503245   |
| <b>RAB31</b>      | 322.878598092589 | 0.945733378118101 | 6.38726090131617e-09 | 2.76133350226799e-06 |
| <b>TMPRSS2</b>    | 780.880799934071 | 0.945802019062892 | 1.49328260195091e-08 | 6.07857444459445e-06 |
| <b>MET</b>        | 2495.03103249175 | 0.962626950784099 | 9.8602052791404e-07  | 0.000252143146791967 |
| <b>PYCARD</b>     | 94.657680741809  | 0.968183008066486 | 0.000124081149640508 | 0.0097823028092078   |
| <b>GPR142</b>     | 674.395741266071 | 0.970875930299713 | 2.50350828525295e-05 | 0.00302636219743365  |
| <b>GNAS</b>       | 39101.3162437221 | 0.976643388762739 | 2.8853725631024e-06  | 0.000618834851006887 |
| <b>SHROOM1</b>    | 168.715645907283 | 0.977429654501559 | 1.18351227195308e-05 | 0.00184339835200186  |
| <b>RGS6</b>       | 684.402523630763 | 0.982914320926207 | 0.000216979501681422 | 0.0142834097047447   |
| <b>ABCG1</b>      | 290.441512263076 | 0.986725884900798 | 1.73823741025047e-08 | 6.93417667697118e-06 |

## Supplementary Figure S1

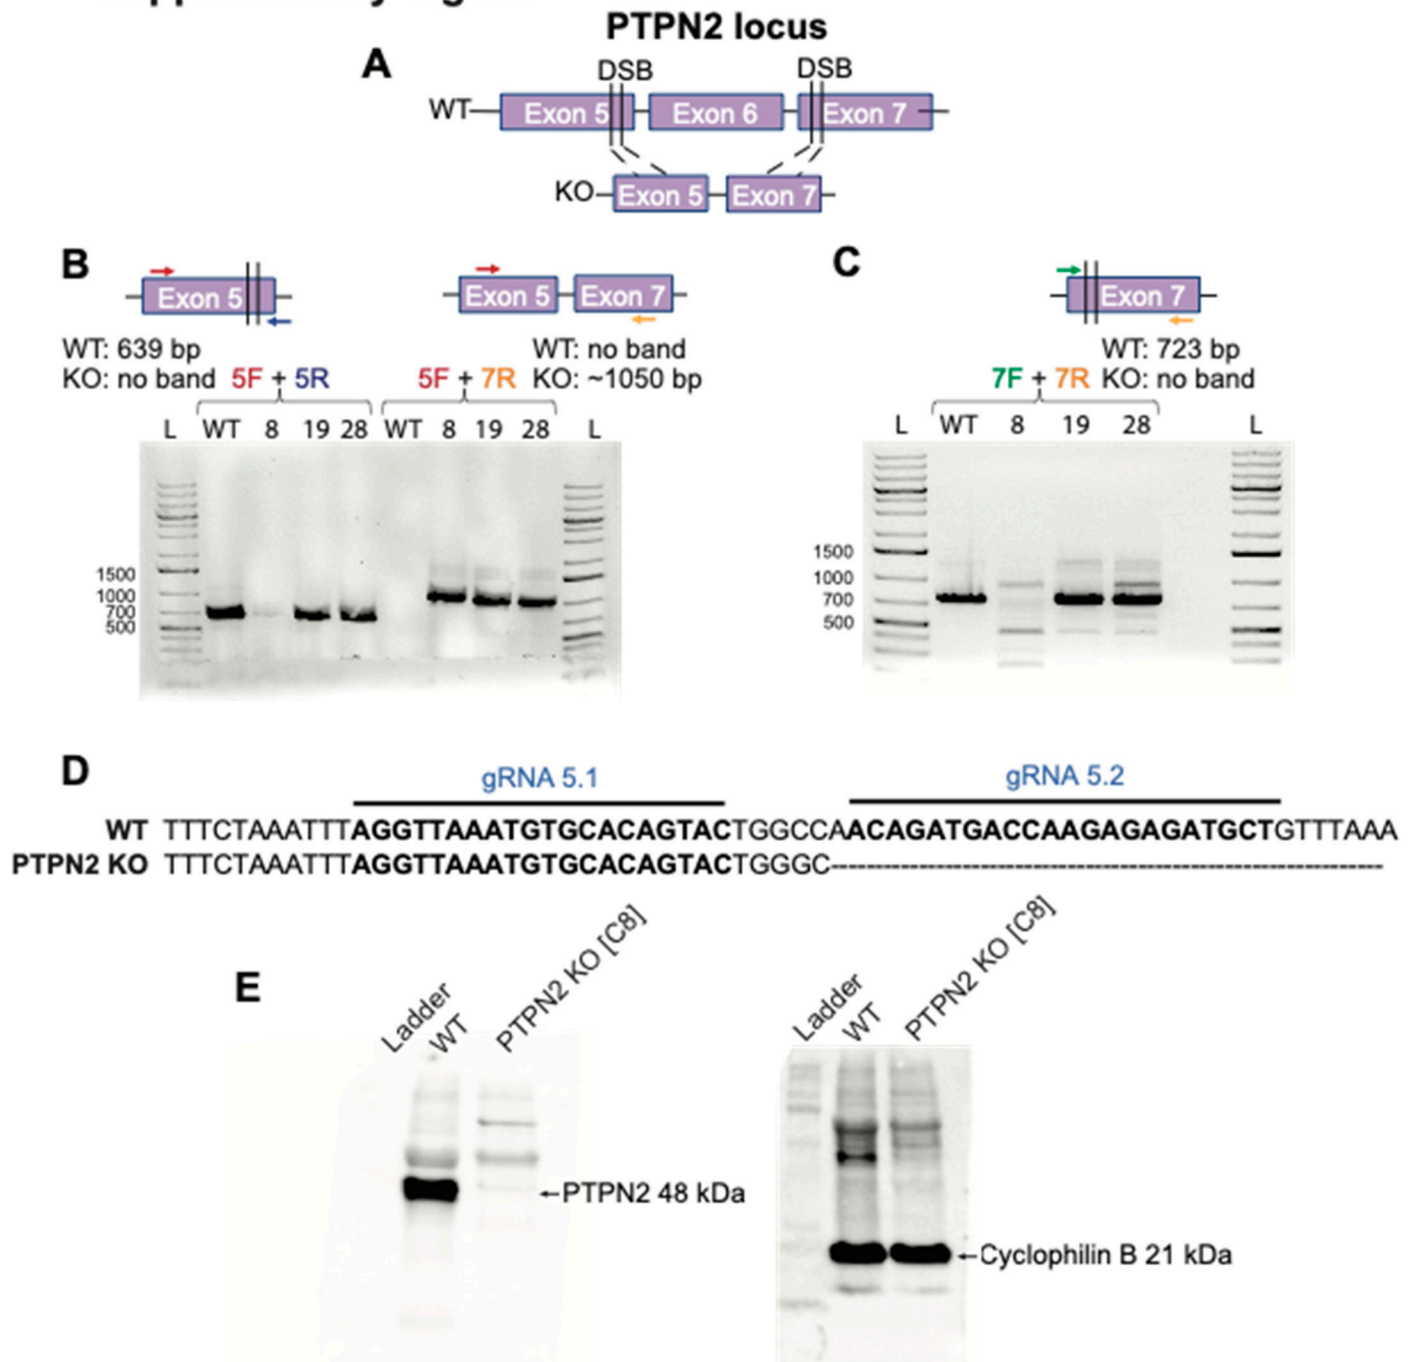

### Supplemental Figure S1: Generation of a CRISPR mediated knock out of *PTPN2* in human pluripotent stem cells

A: Schematic of CRISPR-mediated disruption of *PTPN2* in hPSCs at the functional domain between exons 5 and 7. Two gRNAs targeted the functional domain of *PTPN2* at exon 5 and two at 7 inducing a large frame shift mutation in exon 5. B: gDNA PCR amplification of clonal WT and *PTPN2* KO clones of interest (C8, C19, C28) hPSC lines employing primers that will amplify intact, unedited DNA of exon 5 with the forward primer in exon 5 and the reverse primer in exon 5 and employing primers that will only amplify after successful deletion of DNA piece spanning exon 5-7 with the forward primer in exon 5 and the reverse primer in exon 7. A 639 bp band amplified in WT and no band amplified in the *PTPN2* KO clones for the 5F and 5R primers. A 1050 bp band amplified in the *PTPN2* KO clones and no band amplified in the WT for the 5F and 7R primers. C: gDNA PCR amplification of clonal WT and *PTPN2* KO clones of interest (C8, C19, C28) hPSC lines employing primers that will amplify intact, unedited DNA of exon 7 with the forward primer in exon 7 and the reverse primer in exon 7. A 723 bp band amplified in WT and no band amplified in the *PTPN2* KO clones for the 7F and 7R primers. D: Sanger sequencing of exon 5 in WT and *PTPN2* KO clone 8 after CRISPR-Cas9 double stranded break showing large deletion of bp in clone 8, clones 19 and 28 were excluded due to in-frame deletions. E: Uncropped representative western blot of *PTPN2* protein expression in WT and *PTPN2*

KO hPSC. Bars indicate protein expression in WT hPSCs at 48 kDa and no expression in PTPN2 KO (C8) hPSCs. (n=3 independent analysis) Normalized to endogenous control protein cyclophilin b at 21 kDa.

## Supplementary Figure S2

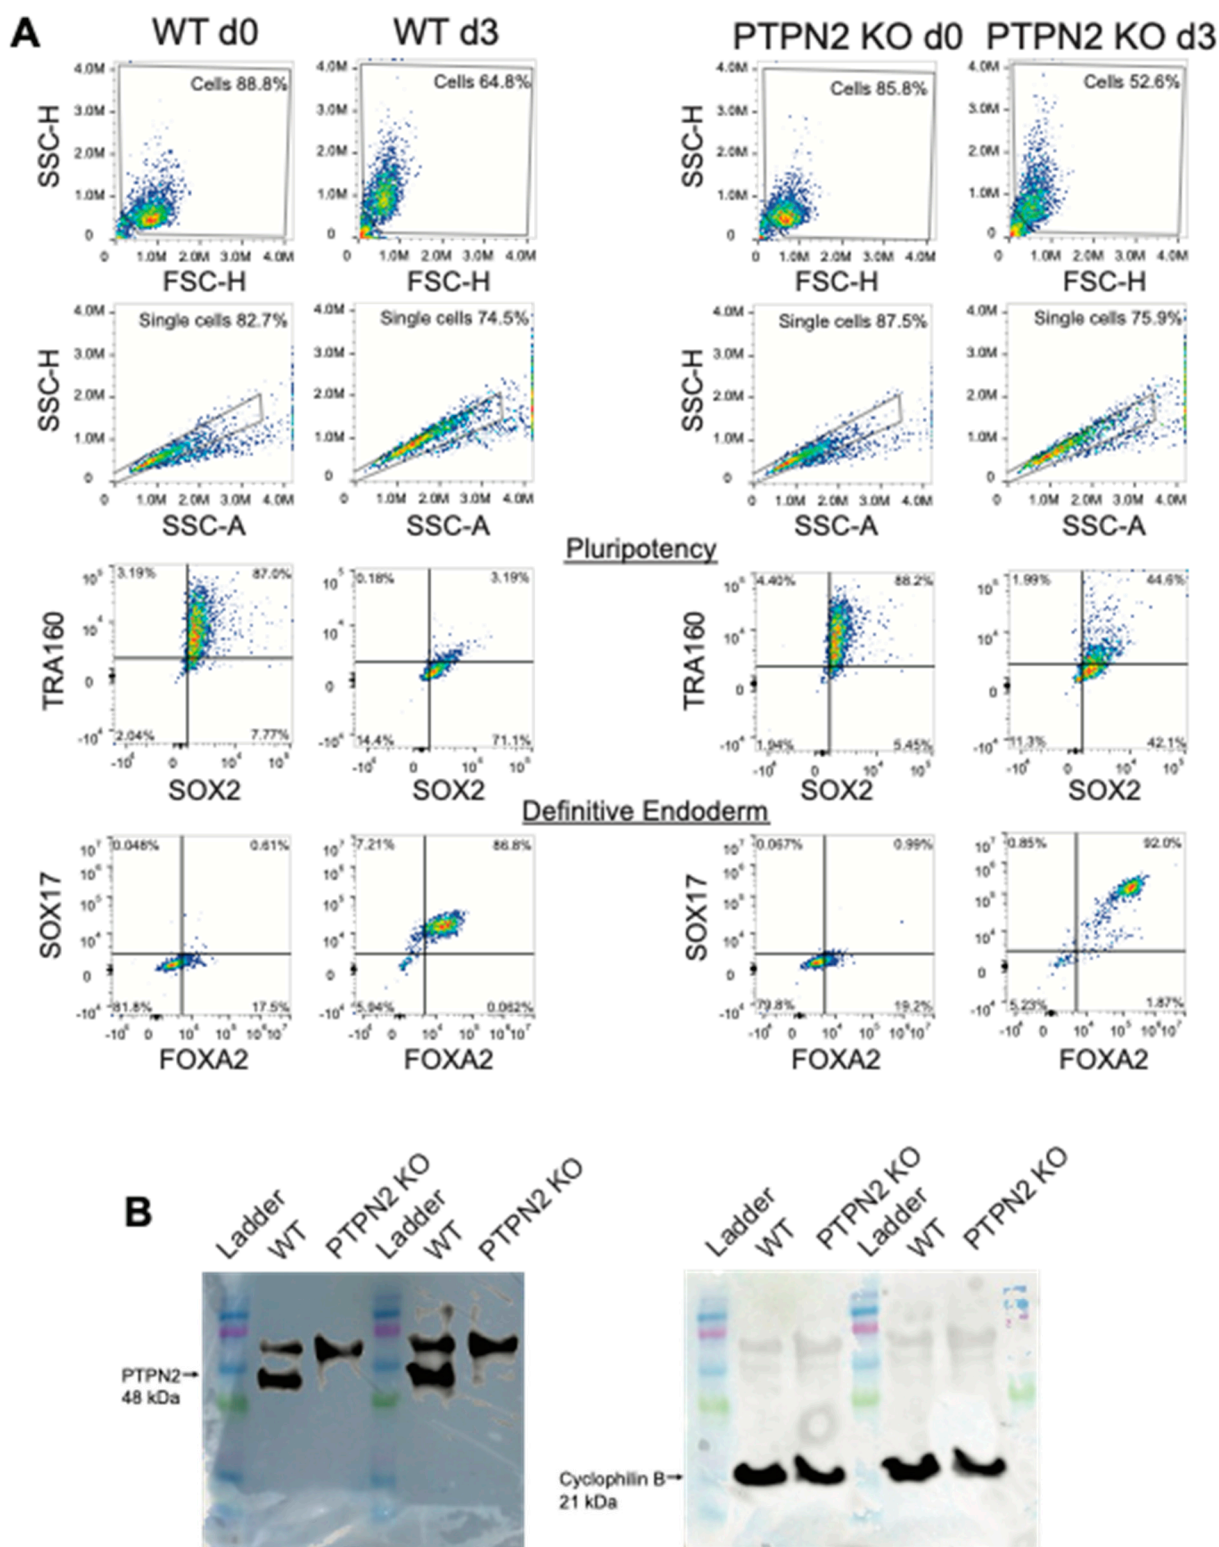

**Supplemental Figure S2: WT and PTPN2 KO sBCs demonstrate similar phenotypic features during direct differentiation**

A: Representative flow cytometric gating strategy throughout differentiation of pluripotency markers (SOX2 and TRA160) and definitive endoderm markers (SOX17 and FOXA2) at day 0 (d0) and day 3 (d3) for WT and PTPN2 KO sBCs. B: Representative western blot of PTPN2 protein at 48 kDa from GFP+ sBCs from WT and PTPN2 KO hPSC. (n=3) Normalized to endogenous control protein cyclophilin B at 21 kDa.

# Supplementary Figure S3

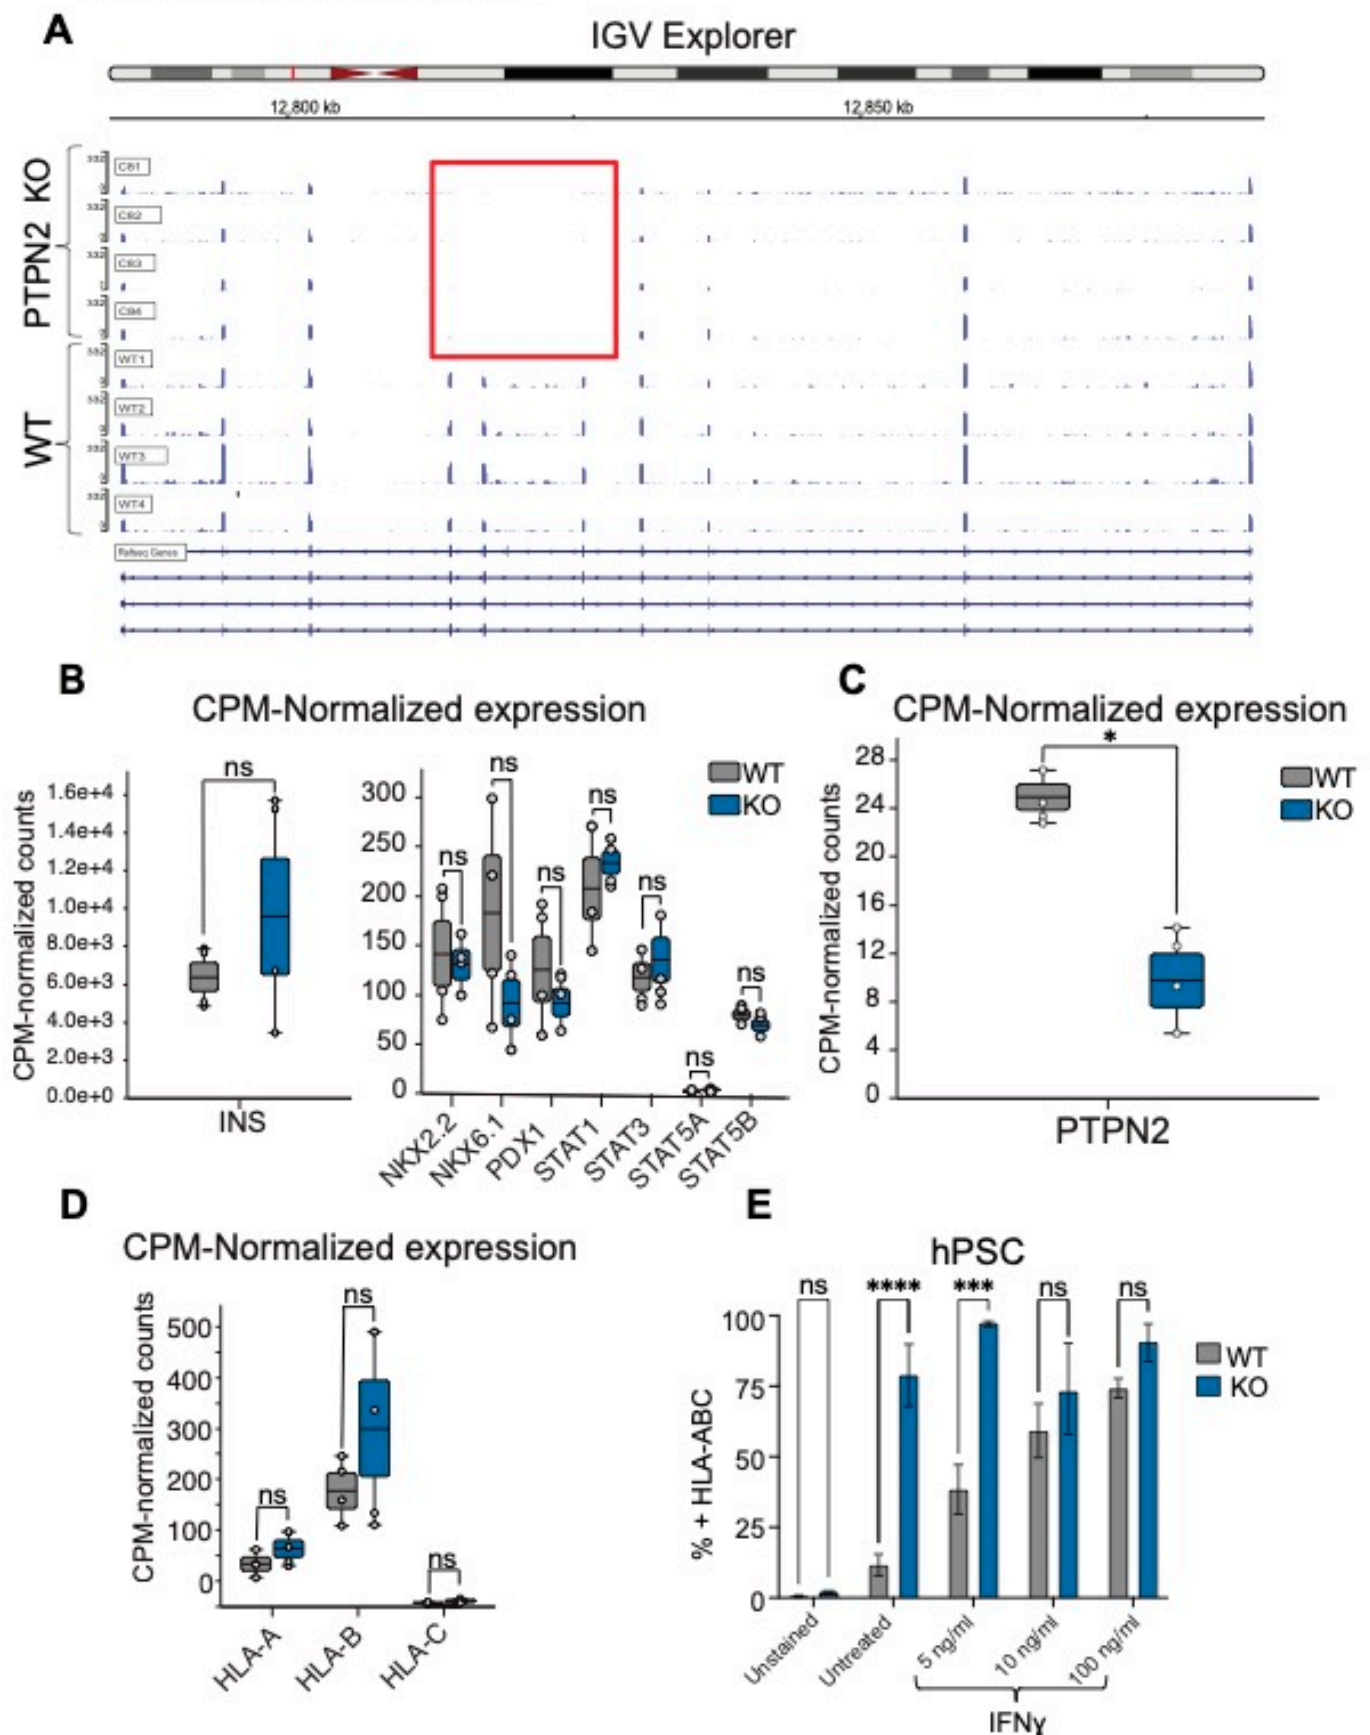

Supplemental Figure S3: RNAseq and HLA Class 1 expression in WT and PTPN2 KO cells

A: Bulk RNAseq IGV explorer from WT and PTPN2 KO GFP+ sBCs demonstrating lack of gene expression in exons 5-8 of the *PTPN2* region for PTPN2 KO compared to WT. B: Bar graph of the CPM-Normalized expression of *INS*, *NKX2.2*, *NKX6.1*, *PDX1*, *STAT1/3/5A/5B* on the y-axis with WT (gray) and PTPN2 KO (blue) GFP+ sBCs on the x-axis. Bars are drawn at the average value for each group and are colored according to group. Error bars represent the average +/- standard deviation (SD). non-significant=ns. C: Bar graph of the CPM-Normalized expression of *PTPN2* on the y-axis with WT (gray) and PTPN2 KO (blue) GFP+ sBCs on the x-axis. Bars are drawn at the average value for each group and are colored according to group. Error bars represent the average +/- standard deviation (SD). \* $p=0.003$ . D: Bar graph of the CPM-Normalized expression of *HLA-ABC* on the y-axis with WT (gray) and PTPN2 KO (blue) GFP+ sBCs on the x-axis. Bars are drawn at the average value for each group and are colored according to group. Error bars represent the average +/- standard deviation (SD). non-significant=ns. E: Flow cytometric quantification of percentage of HLA-ABC expression from WT (gray) and PTPN2 KO (blue) hPSC treated with and without IFN $\gamma$  in increasing concentrations: from 5 ng/ml, 10 ng/ml and 100 ng/ml. (n=4) \*\*\*  $p \leq 0.0002$ , \*\*\*\*  $p \leq 0.0001$ ; non-significant=ns.
